# Supplementary material for: Incomplete human reference genomes can drive false sex biases and expose patient-identifying information in metagenomic data
Source: Research Square preprint supplement (doi:10.21203/rs.3.rs-4721159/v1), 2024-10-23
Supplement: Supplementary file 1 [file a2fa6e679a391180fb05be0c.xlsx]

## Sheet: Sheet1
Sample Group Name	Sample Type	Number of Samples	Use in Manuscript	Figures appeared in Manuscript	Additional Information	Accessions
Tissue Samples from Various Metastatic Cancers from the Hartwig Medical Foundation (HMF)	Human tumor tissue samples	4902	To display sex differences that occur with improper host depletion.	Figure 1 a,b ; Figure 2b	Information on BAM file alignment: https://hartwigmedical.github.io/documentation/data-access-request-methods.html, Various metastatic cancers	Data requisition : https://www.hartwigmedicalfoundation.nl/en/data/data-access-request/
GRCh37.p13	Host reference for human	1	Alignment for HMF bam files	NA	GCF_000001405.25 (GRCh37.p13)	https://www.ncbi.nlm.nih.gov/datasets/genome/GCF_000001405.25/
GRCh38.p7	Host reference for human	1	Host filtration	NA	GCF_000001405.33 (GRCh38.p7)	https://www.ncbi.nlm.nih.gov/datasets/genome/GCF_000001405.33/
GRCh38.p14	Host reference for human	1	Host filtration	NA	GCF_000001405.40 (GRCh38.p14)	https://www.ncbi.nlm.nih.gov/data-hub/genome/GCF_000001405.40/
T2T-CHM13v2.0	Host reference for human	1	Host filtration	NA	GCF_009914755.1 (T2T-CHM13v2.0)	https://www.ncbi.nlm.nih.gov/data-hub/genome/GCF_009914755.1/
Human Pangenome Reference Consortium (HPRC)	Host pangenome reference for human	47	Host filtration and to simulated human data	Figure 1d-f	47 people, a total of 94 diploid genomes	https://humanpangenome.org/data/
Ten Human Pangenomes used in Testing	Host pangenome reference for human, 10 specific references used for testing	10	To simulate human data	Figure 1d-f	5 people, a total of 10 diploid genomes	HG002, HG00438, HG005, HG00621, HG00673 (paternal and maternal references)
FDA-ARGOS Database	Microbial reference genomes	800	To simulate human data	Figure 1d-f	FDA_ARGOS is a database with public quality-controlled reference genomes for diagnostic use and regulatory science	https://argos.igs.umaryland.edu
Human Exome Genomes	Human exomes	30	To confirm human reads are being properly removed	Figure 2a	IGSR phase 3	Various accessions listed here: https://journals.asm.org/doi/10.1128/msystems.01378-21#tabS2
Skin Swabs from Atopic Dermatitis and Healthy Controls in Pediatrics	Human skin swab samples	77	To test a low microbial biomass sample	Figure 2c	Mix of healthy and atopic dermatitis samples	Data is currently part of unpublished study, but is will eventually be available on Qiita (ID #11554). Contact rgallo@health.ucsd.edu to request.
Fecal Samples from Alzheimer's Disease and Healthy Controls in Older Adults	Human fecal samples	50	To test a high microbial biomass sample	Figure 2d	Mix of healthy and Alzheimer's disease (dementia and mild cognitive impairment) samples	Contact colette.blach@duke.edu for data. Will eventually published in future studies and available on Qitta ID #15445.
Tomofuji et al. (2023) fecal samples	Human fecal samples	343	To test the effectiveness of host depletion at removing enough reads to protect patient information.	Figure 2e	Mix of healthy, multiple sclerosis, systemic lupus erythematosus, and cerebral aneurysm samples	JGAS000260, JGAS000316, JGAS000531
Tomofuji et al. (2023) SNP array data	Human blood samples	343	To test the effectiveness of host depletion at removing enough reads to protect patient information.	Figure 2e	Mix of healthy, multiple sclerosis, systemic lupus erythematosus, and cerebral aneurysm samples	EGAS00001007027
