# Supplementary material for: Incomplete human reference genomes can drive false sex biases and expose patient-identifying information in metagenomic data
Source: Research Square preprint supplement (doi:10.21203/rs.3.rs-4721159/v1), 2024-10-23
Supplement: Supplementary file 2 [file bb3dd6ea26a6d55290ca037d.xlsx]

## Sheet: diff_hmf_hg38_RS200_none
gOTU Taxonomy	counts
G000006565 : k__Eukaryota;p__Apicomplexa;c__Conoidasida;o__Eucoccidiorida;f__Sarcocystidae;g__Toxoplasma;s__Toxoplasma gondii	4596907
G009371885 : k__Bacteria;p__Actinobacteria;c__Actinobacteria;o__Bifidobacteriales;f__Bifidobacteriaceae;g__Bifidobacterium;s__Bifidobacterium tibiigranuli	746676
G000300995 : k__Bacteria;p__Proteobacteria;c__Gammaproteobacteria;o__Oceanospirillales;f__Alcanivoracaceae;g__Alcanivorax;s__Alcanivorax hongdengensis	147648
G001046855 : k__Bacteria;p__Actinobacteria;c__Actinobacteria;o__Micrococcales;f__Intrasporangiaceae;g__Tetrasphaera;s__Tetrasphaera japonica	100958
G900010755 : k__Bacteria;p__Actinobacteria;c__Actinobacteria;o__Micrococcales;f__Micrococcaceae;g__Paeniglutamicibacter;s__Paeniglutamicibacter antarcticus	469
G002149925 : k__Bacteria;p__Proteobacteria;c__Gammaproteobacteria;o__Thiotrichales;f__;g__Thioflexothrix;s__Thioflexothrix psekupsii	415
G009725995 : k__Bacteria;p__Bacteroidetes;c__Flavobacteriia;o__Flavobacteriales;f__Flavobacteriaceae;g__Zobellia;s__Zobellia laminariae	400
G000761495 : k__Bacteria;p__Proteobacteria;c__Gammaproteobacteria;o__Pseudomonadales;f__Moraxellaceae;g__Acinetobacter;s__Acinetobacter idrijaensis	376
G002234595 : k__Bacteria;p__Actinobacteria;c__Actinobacteria;o__Pseudonocardiales;f__Pseudonocardiaceae;g__Amycolatopsis;s__Amycolatopsis vastitatis	271
G003007785 : k__Bacteria;p__Cyanobacteria;c__;o__Chroococcales;f__Aphanothecaceae;g__Aphanothece;s__Aphanothece hegewaldii	246
G000181695 : k__Eukaryota;p__Basidiomycota;c__Malasseziomycetes;o__Malasseziales;f__Malasseziaceae;g__Malassezia;s__Malassezia globosa	208
G003583985 : k__Bacteria;p__Bacteroidetes;c__Cytophagia;o__Cytophagales;f__Cyclobacteriaceae;g__Algoriphagus;s__Algoriphagus lacus	164
G900197875 : k__Bacteria;p__Actinobacteria;c__Actinobacteria;o__Frankiales;f__Frankiaceae;g__Frankia;s__Frankia canadensis	154
G001878855 : k__Bacteria;p__Proteobacteria;c__Epsilonproteobacteria;o__Campylobacterales;f__Campylobacteraceae;g__Arcobacter;s__Arcobacter lekithochrous	153
G000636015 : k__Bacteria;p__Proteobacteria;c__Alphaproteobacteria;o__Rhizobiales;f__Hyphomicrobiaceae;g__Rhodomicrobium;s__Rhodomicrobium udaipurense	117
G003611735 : k__Bacteria;p__Proteobacteria;c__Deltaproteobacteria;o__Myxococcales;f__Myxococcaceae;g__Corallococcus;s__Corallococcus sicarius	108
G002563875 : k__Eukaryota;p__Apicomplexa;c__Conoidasida;o__Eucoccidiorida;f__Sarcocystidae;g__Besnoitia;s__Besnoitia besnoiti	92
G001636695 : k__Bacteria;p__Bacteroidetes;c__Sphingobacteriia;o__Sphingobacteriales;f__Sphingobacteriaceae;g__Pedobacter;s__Pedobacter panaciterrae	87
G000169335 : k__Bacteria;p__Cyanobacteria;c__;o__Chroococcales;f__Aphanothecaceae;g__Crocosphaera;s__Crocosphaera chwakensis	87
G000756665 : k__Bacteria;p__Proteobacteria;c__Gammaproteobacteria;o__Oceanospirillales;f__Alcanivoracaceae;g__Alcanivorax;s__Alcanivorax nanhaiticus	80
G000722545 : k__Bacteria;p__Firmicutes;c__Bacilli;o__Bacillales;f__Paenibacillaceae;g__Paenibacillus;s__Paenibacillus tyrfis	69
G003324525 : k__Bacteria;p__Bacteroidetes;c__Sphingobacteriia;o__Sphingobacteriales;f__Sphingobacteriaceae;g__Mucilaginibacter;s__Mucilaginibacter hurinus	63
G002105465 : k__Bacteria;p__Proteobacteria;c__Alphaproteobacteria;o__Caulobacterales;f__Caulobacteraceae;g__Aquidulcibacter;s__Aquidulcibacter paucihalophilus	57
G003668875 : k__Bacteria;p__Proteobacteria;c__Deltaproteobacteria;o__Myxococcales;f__Myxococcaceae;g__Corallococcus;s__Corallococcus interemptor	32
G004793425 : k__Bacteria;p__;c__;o__;f__;g__;s__bacterium NHP-B	31
G003265325 : k__Bacteria;p__Proteobacteria;c__Alphaproteobacteria;o__Rhodobacterales;f__Rhodobacteraceae;g__Oceanibium;s__Oceanibium sediminis	28
G000308495 : k__Bacteria;p__Actinobacteria;c__Actinobacteria;o__Corynebacteriales;f__Nocardiaceae;g__Nocardia;s__Nocardia brevicatena	27
G001541335 : k__Bacteria;p__Proteobacteria;c__Gammaproteobacteria;o__Vibrionales;f__Vibrionaceae;g__Vibrio;s__Vibrio toranzoniae	15
G000972495 : k__Bacteria;p__Bacteroidetes;c__Cytophagia;o__Cytophagales;f__Hymenobacteraceae;g__Hymenobacter;s__Hymenobacter terrenus	14
G001705345 : k__Bacteria;p__Proteobacteria;c__Epsilonproteobacteria;o__Campylobacterales;f__Campylobacteraceae;g__Campylobacter;s__Campylobacter ornithocola	10
G003990895 : k__Bacteria;p__Thermotogae;c__Thermotogae;o__Thermotogales;f__Fervidobacteriaceae;g__Thermosipho;s__Thermosipho globiformans	7
G004355005 : k__Bacteria;p__Proteobacteria;c__Alphaproteobacteria;o__Rhodospirillales;f__Acetobacteraceae;g__Dankookia;s__Dankookia rubra	6
G003332885 : k__Bacteria;p__Bacteroidetes;c__Chitinophagia;o__Chitinophagales;f__Chitinophagaceae;g__Paracnuella;s__Paracnuella aquatica	5
G900604295 : k__Bacteria;p__Proteobacteria;c__Alphaproteobacteria;o__Rhizobiales;f__Hyphomicrobiaceae;g__Rhodoplanes;s__Rhodoplanes piscinae	5
G000956335 : k__Eukaryota;p__Apicomplexa;c__Aconoidasida;o__Haemosporida;f__Plasmodiidae;g__Plasmodium;s__Plasmodium fragile	3
G000469345 : k__Bacteria;p__Firmicutes;c__Clostridia;o__Clostridiales;f__Eubacteriaceae;g__Eubacterium;s__Eubacterium ramulus	3
G006007885 : k__Bacteria;p__Firmicutes;c__Bacilli;o__Bacillales;f__Bacillaceae;g__Bacillus;s__Bacillus natronophilus	3
G010994275 : k__Bacteria;p__Bacteroidetes;c__Cytophagia;o__Cytophagales;f__Cyclobacteriaceae;g__Cyclobacterium;s__Cyclobacterium jeungdonense	3
G000234665 : k__Eukaryota;p__Euglenozoa;c__Kinetoplastea;o__Trypanosomatida;f__Trypanosomatidae;g__Leishmania;s__Leishmania mexicana	3
G001404755 : k__Bacteria;p__Firmicutes;c__Clostridia;o__Clostridiales;f__Lachnospiraceae;g__Blautia;s__Blautia wexlerae	2
G002021095 : k__Bacteria;p__Proteobacteria;c__Gammaproteobacteria;o__;f__;g__;s__Solemya elarraichensis gill symbiont	2
G900450595 : k__Bacteria;p__Firmicutes;c__Bacilli;o__Bacillales;f__;g__;s__[Flavobacterium] thermophilum	2
G001619955 : k__Bacteria;p__Proteobacteria;c__Alphaproteobacteria;o__Sphingomonadales;f__Sphingomonadaceae;g__Sphingomonas;s__Sphingomonas hankookensis	2
G002763695 : k__Bacteria;p__Fusobacteria;c__Fusobacteriia;o__Fusobacteriales;f__Fusobacteriaceae;g__Fusobacterium;s__Fusobacterium pseudoperiodonticum	2
G001998765 : k__Bacteria;p__Firmicutes;c__Clostridia;o__Clostridiales;f__Lachnospiraceae;g__Anaerostipes;s__Anaerostipes hadrus	2
G000158215 : k__Bacteria;p__Fusobacteria;c__Fusobacteriia;o__Fusobacteriales;f__Fusobacteriaceae;g__Fusobacterium;s__Fusobacterium periodonticum	2
G008932115 : k__Bacteria;p__Proteobacteria;c__Alphaproteobacteria;o__Rhizobiales;f__Bradyrhizobiaceae;g__Bradyrhizobium;s__Bradyrhizobium betae	1
G005046945 : k__Bacteria;p__Firmicutes;c__Tissierellia;o__Tissierellales;f__Tissierellaceae;g__Tissierella;s__Tissierella creatinini	1
G006542645 : k__Bacteria;p__Bacteroidetes;c__Bacteroidia;o__Bacteroidales;f__Rikenellaceae;g__Alistipes;s__Alistipes onderdonkii	1
G002086155 : k__Bacteria;p__Actinobacteria;c__Actinobacteria;o__Corynebacteriales;f__Mycobacteriaceae;g__Mycobacterium;s__Mycobacterium angelicum	1
G009982895 : k__Bacteria;p__Deinococcus-Thermus;c__Deinococci;o__Deinococcales;f__Deinococcaceae;g__Deinococcus;s__Deinococcus alpinitundrae	1
G004551525 : k__Bacteria;p__Proteobacteria;c__Gammaproteobacteria;o__Vibrionales;f__Vibrionaceae;g__Vibrio;s__Vibrio ouci	1
G900116675 : k__Bacteria;p__Proteobacteria;c__Alphaproteobacteria;o__Rhizobiales;f__Bradyrhizobiaceae;g__Bradyrhizobium;s__Bradyrhizobium arachidis	1
G000011065 : k__Bacteria;p__Bacteroidetes;c__Bacteroidia;o__Bacteroidales;f__Bacteroidaceae;g__Bacteroides;s__Bacteroides thetaiotaomicron	1
G000020205 : k__Bacteria;p__Proteobacteria;c__Betaproteobacteria;o__Burkholderiales;f__Burkholderiaceae;g__Ralstonia;s__Ralstonia pickettii	1
G001641265 : k__Eukaryota;p__Ascomycota;c__Leotiomycetes;o__;f__Pseudeurotiaceae;g__Pseudogymnoascus;s__Pseudogymnoascus destructans	1
G004353985 : k__Bacteria;p__Proteobacteria;c__Alphaproteobacteria;o__Rhodospirillales;f__Acetobacteraceae;g__Paracraurococcus;s__Paracraurococcus ruber	1
G000008345 : k__Bacteria;p__Actinobacteria;c__Actinobacteria;o__Propionibacteriales;f__Propionibacteriaceae;g__Cutibacterium;s__Cutibacterium acnes	1
G003719485 : k__Eukaryota;p__Euglenozoa;c__Kinetoplastea;o__Trypanosomatida;f__Trypanosomatidae;g__Trypanosoma;s__Trypanosoma conorhini	1
G003674045 : k__Bacteria;p__Actinobacteria;c__Actinobacteria;o__Streptomycetales;f__Streptomycetaceae;g__Streptomyces;s__Streptomyces griseocarneus	1
G001693775 : k__Bacteria;p__Firmicutes;c__Clostridia;o__Clostridiales;f__Peptostreptococcaceae;g__Criibacterium;s__Criibacterium bergeronii	1
G003667445 : k__Bacteria;p__Proteobacteria;c__Alphaproteobacteria;o__Rhizobiales;f__Xanthobacteraceae;g__Xanthobacter;s__Xanthobacter tagetidis	1
G000280865 : k__Bacteria;p__Actinobacteria;c__Actinobacteria;o__Streptomycetales;f__Streptomycetaceae;g__Streptomyces;s__Streptomyces auratus	1
G001717135 : k__Bacteria;p__Firmicutes;c__Clostridia;o__Clostridiales;f__Lachnospiraceae;g__Eisenbergiella;s__Eisenbergiella tayi	1
G003344765 : k__Bacteria;p__Proteobacteria;c__Alphaproteobacteria;o__Rhodospirillales;f__Rhodospirillaceae;g__Ferruginivarius;s__Ferruginivarius sediminum	1
G001402935 : k__Archaea;p__Euryarchaeota;c__Thermoplasmata;o__Thermoplasmatales;f__Ferroplasmaceae;g__Acidiplasma;s__Acidiplasma cupricumulans	1
G000499545 : k__Eukaryota;p__Apicomplexa;c__Conoidasida;o__Eucoccidiorida;f__Eimeriidae;g__Eimeria;s__Eimeria tenella	1
G002266285 : k__Bacteria;p__Firmicutes;c__Bacilli;o__Bacillales;f__Bacillaceae;g__Virgibacillus;s__Virgibacillus indicus	1
G000956535 : k__Bacteria;p__Actinobacteria;c__Actinobacteria;o__Micrococcales;f__Microbacteriaceae;g__Microbacterium;s__Microbacterium ginsengisoli	1
G001405555 : k__Bacteria;p__Firmicutes;c__Clostridia;o__Clostridiales;f__Lachnospiraceae;g__Fusicatenibacter;s__Fusicatenibacter saccharivorans	1
