# Supplementary material for: Incomplete human reference genomes can drive false sex biases and expose patient-identifying information in metagenomic data
Source: Research Square preprint supplement (doi:10.21203/rs.3.rs-4721159/v1), 2024-10-23
Supplement: Supplementary file 2 [file de1833778888642e445a4a89.pdf]

**a**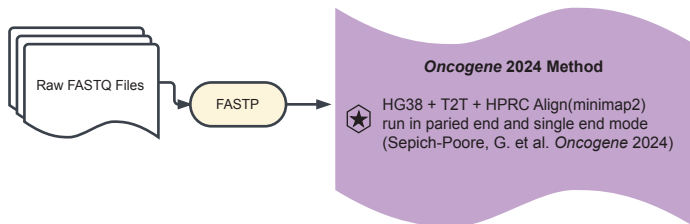

| Human Reference     | Filtration Technique | Pipeline Modifications                |
|---------------------|----------------------|---------------------------------------|
| ★ HG38 + T2T + HPRC | ● Align(minimap2)    | ⬡ Run in paired end + single end mode |

**b**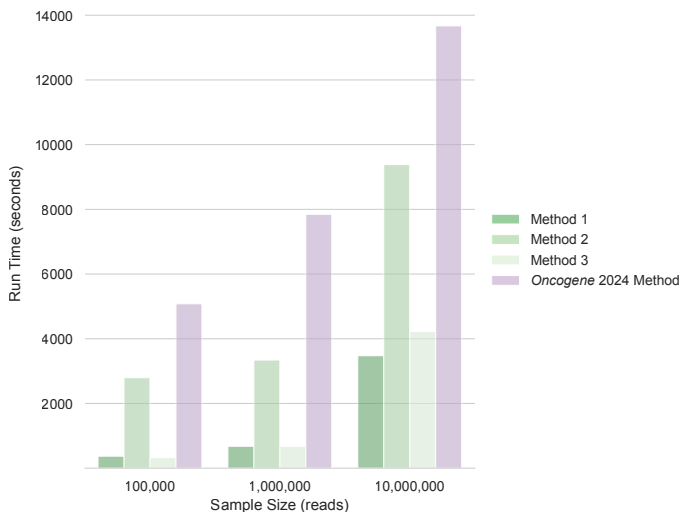

**Supplementary Figure 2. Host filtration pipeline runtime evaluation** (a) Pipeline of prior host filtration methods. (b) Using simulated data with a 50/50 mix of human data from HPRC[20] and microbial data from FDA-ARGOS[16], we ran the 3 host filtration methods displayed in the paper along with the prior method as outlined in (a) with 3 different sample sizes. Runtimes were averaged across 10 runs per sample size. HG38 : GRCH38.p14, T2T: T2T-CHM13v2.0, HPRC: Human Pangome Reference Consortium 2024 release.
