# Supplementary material for: Incomplete human reference genomes can drive false sex biases and expose patient-identifying information in metagenomic data
Source: Research Square preprint supplement (doi:10.21203/rs.3.rs-4721159/v1), 2024-10-23
Supplement: Supplementary file 3 [file f6e679087342d2182903a53f.xlsx]

## Sheet: current
Sample group name	Method	Number of forward and reverse reads summed across all samples												Median number of forward and reverse reads per sample
		Before host filtration*	Remaining after host filtration (putative non-human reads)		Removed with host filtration (putative human reads)		Aligning to bacterial genomes	Aligning to microbial eukaryota genomes	Aligning to viral genomes	Aligning to archaea genomes	Aligning to microbial genomes	Percentage of putative non-human reads aligning to microbial genomes	Percentage of all reads aligning to microbial genomes	Before host filtration*	Remaining after host filtration (putative non-human reads)		Removed with host filtration (putative human reads)
Simulated Human and Microbial Data	Method 1	20000000	9998162	0.499908	10001838	0.500092	7017165	189	1591	0	7018945	0.702024	0.350947	2000000	999821	0.49991	1000179	0.500089
	Method 2	20000000	9993266	0.499663	10006734	0.500337	7014135	189	1591	0	7015915	0.702064	0.350796	2000000	999336	0.499668	1000664	0.500332
	Method 3	20000000	9999246	0.499962	10000754	0.500038	7017787	189	1591	0	7019567	0.70201	0.350978	2000000	999920	0.49996	1000080	0.50004
Human Exome from the 1000 Genomes Project	Method 1	60000000	1960	3.26667e-05	59998040	0.999967	394	9	626	0	1029	0.525	1.715e-05	2000000	48	2.4e-05	1999952	0.999976
	Method 2	60000000	1440	2.4e-05	59998560	0.999976	393	9	614	0	1016	0.705556	1.69333e-05	2000000	34	1.7e-05	1999966	0.999983
	Method 3	60000000	21092	0.000351533	59978908	0.999648	18684	212	710	106	19712	0.934572	0.000328533	2000000	77	3.85e-05	1999923	0.999961
Tissue Samples from Various Metastatic Cancers	Method 1	73548466	16932624	0.230224	56615842	0.769776	5797526	48764	14218	52058	5912566	0.349182	0.0803901	486258	28758	0.0728932	457500	0.927107
	Method 2	73548466	16801806	0.228445	56746660	0.771555	5790296	48573	14214	51968	5905051	0.351453	0.0802879	486258	28436	0.0725076	457822	0.927492
	Method 3	73548466	16938542	0.230304	56609924	0.769696	5797604	48773	14227	52057	5912661	0.349066	0.0803914	486258	28796	0.072934	457462	0.927066
Skin Swabs from Pediatric Atopic Dermatitis Patients and Healthy Controls	Method 1	1909231986	304343944	0.159406	1604888042	0.840594	190866776	25192831	344535	10379	216414521	0.711085	0.113352	20540008	1700678	0.0857865	18839330	0.914214
	Method 2	1909231986	303746264	0.159093	1605485722	0.840907	190776341	25098227	343658	10363	216228589	0.711872	0.113254	20540008	1694494	0.0854745	18845514	0.914525
	Method 3	1909231986	304881624	0.159688	1604350362	0.840312	190910753	25266618	345183	10399	216532953	0.71022	0.113414	20540008	1705330	0.0860211	18834678	0.913979
Fecal Samples from Alzheimer's Disease Patients and Healthy Controls	Method 1	714181336	700245624	0.980487	13935712	0.0195128	352585319	14699	287653	1021296	353908967	0.505407	0.495545	5457978	5347176	0.979772	110802	0.0202275
	Method 2	714181336	699755412	0.979801	14425924	0.0201992	352399778	14518	287576	1017507	353719379	0.50549	0.49528	5457978	5343641	0.97912	114337	0.0208795
	Method 3	714181336	700418382	0.980729	13762954	0.019271	352650134	14796	287705	1022851	353975486	0.505377	0.495638	5457978	5348316	0.979953	109662	0.0200475

## Sheet: Copy of current
		Number of reads summed across all samples								Median number of reads per sample
Sample group name	Method	Before host filtration*	Remaining after host filtration (putative non-human reads)		Removed with host filtration (putative human reads)		Aligning to bacterial genomes	Percentage of putative non-human reads aligning to microbial genomes	Percentage of all reads aligning to microbial genomes	Before host filtration*	Remaining after host filtration (putative non-human reads)		Removed with host filtration (putative human reads)		Aligning to microbial genomes	Percentage of putative non-human reads aligning to microbial genomes	Percentage of all reads aligning to microbial genomes		Aligning to bacterial genomes	Aligning to eukaryotic genomes/ other
Simulated Human and Microbial Data	Method 1	20000000	9998162	0.499908	10001838	0.500092	7018945	0.702024	0.350947	2000000	999821	0.49991	1000179	0.500089	701788	0.701913	0.350894
	Method 2	20000000	9993266	0.499663	10006734	0.500337	7015915	0.702064	0.350796	2000000	999336	0.499668	1000664	0.500332	701508	0.701975	0.350754
	Method 3	20000000	9999246	0.499962	10000754	0.500038	7019567	0.70201	0.350978	2000000	999920	0.49996	1000080	0.50004	701846	0.701903	0.350923
Human Exome	Method 1	60000000	1960	3.26667e-05	59998040	0.999967	1029	0.525	1.715e-05	2000000	48	2.4e-05	1999952	0.999976	31	0.645833	1.55e-05
	Method 2	60000000	1440	2.4e-05	59998560	0.999976	1016	0.705556	1.69333e-05	2000000	34	1.7e-05	1999966	0.999983	31	0.911765	1.55e-05
	Method 3	60000000	21092	0.000351533	59978908	0.999648	19712	0.934572	0.000328533	2000000	77	3.85e-05	1999923	0.999961	38	0.493506	1.9e-05
Tissue Samples from Various Metastatic Cancers	Method 1	73548466	16932624	0.230224	56615842	0.769776	5912566	0.349182	0.0803901	486258	28758	0.0728932	457500	0.927107	9797	0.34067	0.0201477
	Method 2	73548466	16801806	0.228445	56746660	0.771555	5905051	0.351453	0.0802879	486258	28436	0.0725076	457822	0.927492	9784	0.344071	0.020121
	Method 3	73548466	16938542	0.230304	56609924	0.769696	5912661	0.349066	0.0803914	486258	28796	0.072934	457462	0.927066	9794	0.340117	0.0201416
Skin Swabs from Atopic Dermatits and Healthy Controls in a Pediatric Population	Method 1	1909231986	304343944	0.159406	1604888042	0.840594	246855025	0.811105	0.129295	20540008	1700678	0.0857865	18839330	0.914214	1.51393e+06	0.890192	0.0737064
	Method 2	1909231986	303746264	0.159093	1605485722	0.840907		0	0	20540008	1694494	0.0854745	18845514	0.914525		0	0
	Method 3	1909231986	304881624	0.159688	1604350362	0.840312	243847238	0.79981	0.12772	20540008	1705330	0.0860211	18834678	0.913979	1495491	0.876951	0.0728087
Fecal Samples from Alzheimer’s Disease & Healthy Controls	Method 1	714181336	700245624	0.980487	13935712	0.0195128		0	0	5457978	5347176	0.979772	110802	0.0202275		0	0
	Method 2	714181336	699755412	0.979801	14425924	0.0201992		0	0	5457978	5343641	0.97912	114337	0.0208795		0	0
	Method 3	714181336	700418382	0.980729	13762954	0.019271	353975486	0.505377	0.495638	5457978	5348316	0.979953	109662	0.0200475	2.88706e+06	0.539807	0.528961
* In the case of Tissue Samples from Various Metastic Cancers, the Before host filtration number is following GRCh38.p7 host filtration
RS210 per Genome

## Sheet: old_usingScriptCounts
		Number of reads summed across all samples								Median number of reads per sample
Sample group name	Method	Before host filtration*	Remaining after host filtration (putative non-human reads)		Removed with host filtration (putative human reads)		Aligning to bacterial genomes	Percentage of putative non-human reads aligning to microbial genomes	Percentage of all reads aligning to microbial genomes	Before host filtration	Remaining after host filtration (putative non-human reads)		Removed with host filtration (putative human reads)		Aligning to microbial genomes	Percentage of putative non-human reads aligning to microbial genomes	Percentage of all reads aligning to microbial genomes		Aligning to bacterial genomes	Aligning to eukaryotic genomes/ other
Simulated Human and Microbial Data	Method 1	20000000	9998162	0.499908	10001838	0.500092	7021958	0.702325	0.351098	2000000	999821	0.49991	1000179	0.500089	702265	0.702391	0.351133
	Method 2	20000000	9993266	0.499663	10006734	0.500337	7018914	0.702364	0.350946	2000000	999336	0.499668	1000664	0.500332	701809	0.702275	0.350905
	Method 3	20000000	9999246	0.499962	10000754	0.500038	7022575	0.70231	0.351129	2000000	999920	0.49996	1000080	0.50004	702146	0.702202	0.351073
Human Exome	Method 1	60000000	1960	3.26667e-05	59998040	0.999967	1103	0.562755	1.83833e-05	2000000	48	2.4e-05	1999952	0.999976	34	0.708333	1.7e-05
	Method 2	60000000	1440	2.4e-05	59998560	0.999976	1091	0.757639	1.81833e-05	2000000	34	1.7e-05	1999966	0.999983	34	1	1.7e-05
	Method 3	60000000	21092	0.000351533	59978908	0.999648	9940	0.471269	0.000165667	2000000	77	3.85e-05	1999923	0.999961	19	0.246753	9.5e-06
Tissue Samples from Various Metastatic Cancers	Method 1	73548466	16932624	0.230224	56615842	0.769776	5926996	0.350034	0.0805863	486258	28758	0.0728932	457500	0.927107	9918	0.344878	0.0203966
	Method 2	73548466	16801806	0.228445	56746660	0.771555	5919488	0.352313	0.0804842	486258	28436	0.0725076	457822	0.927492	9905	0.348326	0.0203698
	Method 3	73548466	16938542	0.230304	56609924	0.769696	6908738	0.407871	0.0939345	486258	28796	0.072934	457462	0.927066	11834	0.41096	0.0243369
Skin Swabs from Atopic Dermatits and Healthy Controls in a Pediatric Population	Method 1	1909231986	304343944	0.159406	1604888042	0.840594	0	0	0	20540008	1700678	0.0857865	18839330	0.914214	0	0	0
	Method 2	1909231986	303746264	0.159093	1605485722	0.840907	0	0	0	20540008	1694494	0.0854745	18845514	0.914525	0	0	0
	Method 3	1909231986	304881624	0.159688	1604350362	0.840312	0	0	0	20540008	1705330	0.0860211	18834678	0.913979	0	0	0
Fecal Samples from Alzheimer’s Disease & Healthy Controls	Method 1	714181336	700245624	0.980487	13935712	0.0195128	0	0	0	5457978	5347176	0.979772	110802	0.0202275	0	0	0
	Method 2	714181336	699755412	0.979801	14425924	0.0201992	0	0	0	5457978	5343641	0.97912	114337	0.0208795	0	0	0
	Method 3	714181336	700418382	0.980729	13762954	0.019271	0	0	0	5457978	5348316	0.979953	109662	0.0200475	0	0	0
* In the case of Tissue Samples from Various Metastic Cancers, the Before host filtration number is following GRCh38.p7 host filtration

## Sheet: old_usingR1only
		Number of reads summed across all samples								Median number of reads per sample
Sample group name	Method	Before host filtration*	Remaining after host filtration (putative non-human reads)		Removed with host filtration (putative human reads)		Aligning to bacterial genomes	Aligning to microbial genomes	Aligning to eukaryotic genomes/ other	Before host filtration	Remaining after host filtration (putative non-human reads)		Removed with host filtration (putative human reads)		Aligning to bacterial genomes	Aligning to microbial genomes			Aligning to eukaryotic genomes/ other
Simulated Human and Microbial Data	Method 1	10000000	4999081	0.499908	5000919	0.500092				1000000	499910	0.49991	500090	0.500089		351132	0.70239	0.351132
	Method 2	10000000	4996633	0.499663	5003367	0.500337				1000000	499668	0.499668	500332	0.500332
	Method 3	10000000	4999623	0.499962	5000377	0.500038				1000000	499960	0.49996	500040	0.50004
Human Exome	Method 1	30000000	980	3.26667e-05	29999020	0.999967				1000000	24	2.4e-05	999976	0.999976
	Method 2	30000000	720	2.4e-05	29999280	0.999976				1000000	17	1.7e-05	999983	0.999983
	Method 3	30000000	10546	0.000351533	29989454	0.999648				1000000	38.5	3.85e-05	999962	0.999961
Tissue Samples from Various Metastatic Cancers	Method 1	36774233	8466312	0.230224	28307921	0.769776				243129	14379	0.0728932	228750	0.927107
	Method 2	36774233	8400903	0.228445	28373330	0.771555				243129	14218	0.0725076	228911	0.927492
	Method 3	36774233	8469271	0.230304	28304962	0.769696				243129	14398	0.072934	228731	0.927066
Skin Swabs from Atopic Dermatits and Healthy Controls in a Pediatric Population	Method 1	954615993	152171972	0.159406	802444021	0.840594				10270004	850339	0.0857865	9419665	0.914214
	Method 2	954615993	151873132	0.159093	802742861	0.840907				10270004	847247	0.0854745	9422757	0.914525
	Method 3	954615993	152440812	0.159688	802175181	0.840312				10270004	852665	0.0860211	9417339	0.913979
Fecal Samples from Alzheimer’s Disease & Healthy Controls	Method 1	357090668	350122812	0.980487	6967856	0.0195128				2728989	2673588	0.979772	55401	0.0202275
	Method 2	357090668	349877706	0.979801	7212962	0.0201992				2728989	2.67182e+06	0.97912	57168.5	0.0208795
	Method 3	357090668	350209191	0.980729	6881477	0.019271				2728989	2674158	0.979953	54831	0.0200475
